# Supplementary material
Source: publisher figshare collection journal article supplement (https://karger.figshare.com/ndownloader/files/6961619)
Supplement: Supplementary file 1 [file 6961619]

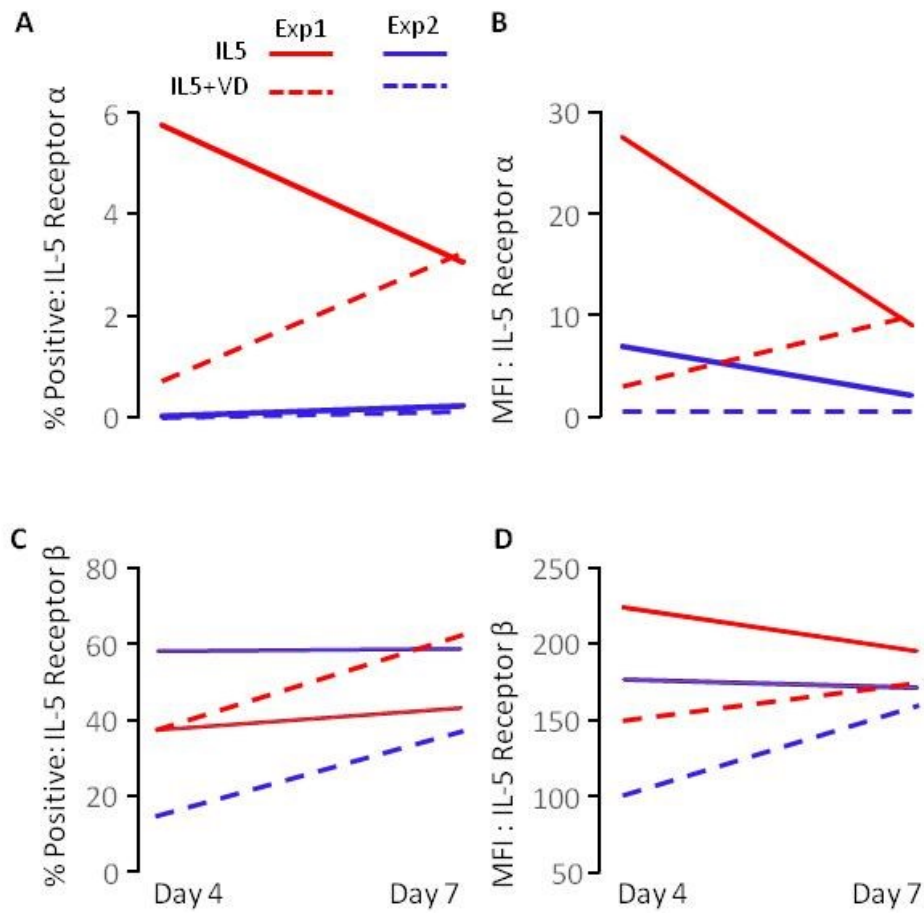

**Supplementary figure 1:** Calcitriol does not influence IL-5R surface expression on eosinophils ex vivo (days 4 & 7; n = 2). (A) Percent and (B) Mean Fluorescence Intensity (MFI) of IL-5R $\alpha$  positive eosinophils measured by flow cytometry in response to the addition of calcitriol (10 nM). (C) Percent and (D) MFI of IL-5R $\beta$  positive eosinophils following calcitriol (10 nM) treatment.
